# Supplementary material for: Effect of BMAP-28 Antimicrobial Peptides on Leishmania major Promastigote and Amastigote Growth: Role of Leishmanolysin in Parasite Survival
Source: PubMed Central journal article supplement (PMC3104953; doi:10.1371/journal.pntd.0001141), 2011-05-31
Supplement: pntd.0001141.s003.pdf [file pntd.0001141.s003.pdf]

| <b>Percentage cell viability</b>    |             |             |
|-------------------------------------|-------------|-------------|
|                                     | <b>24 h</b> | <b>72 h</b> |
| <b>1 <math>\mu</math>M L-BMAP</b>   | <b>98.3</b> | <b>64.7</b> |
| <b>5 <math>\mu</math>M L-BMAP</b>   | <b>96.4</b> | <b>68.7</b> |
| <b>1 <math>\mu</math>M Ri-BMAP</b>  | <b>98.8</b> | <b>86.6</b> |
| <b>5 <math>\mu</math>M Ri -BMAP</b> | <b>96.5</b> | <b>87.7</b> |
| <b>1 <math>\mu</math>M D-BMAP</b>   | <b>100</b>  | <b>62</b>   |
| <b>5 <math>\mu</math>M D-BMAP</b>   | <b>94.9</b> | <b>55</b>   |
